# Supplementary material
Source: PubMed Central journal article supplement (PMC2781511)

## Supplemental data

### Tables

**Table I** Sequence of oligopeptides used as substrates with corresponding protein names.

| Oligopeptide sequence                             | Protein name                            |
|---------------------------------------------------|-----------------------------------------|
| [H] <b><u>SY</u>SMDHF</b> RWGRPVGRRRRPVRVYP[OH]*  | ACTH (aa 138-161) (P01189)              |
| [H] <b><u>SE</u>SSSKS</b> RWGRPVGRRRRPVRVYP[OH] * | High mobility group protein A1 (P17096) |
| [H] <b><u>MLG</u>PEGG</b> RWGRPVGRRRRPVRVYP [OH]* | hnRNP F; (P52597)                       |
| [H] <b><u>MLD</u>PEGG</b> RWGRPVGRRRRPVRVYP [OH]* | hnRNP F; G3D mutant                     |
| [H] <b><u>MLL</u>PEGG</b> RWGRPVGRRRRPVRVYP [OH]* | hnRNP F; G3L mutant                     |
| [H] <b><u>MLR</u>PEGG</b> RWGRPVGRRRRPVRVYP [OH]* | hnRNP F; G3R mutant                     |
| [H] <b><u>MIG</u>PEGG</b> RWGRPVGRRRRPVRVYP [OH]* | hnRNP F; L2I mutant                     |
| [H] <b><u>MFG</u>PEGG</b> RWGRPVGRRRRPVRVYP [OH]* | hnRNP F; L2F mutant                     |
| [H] <b><u>MLGTE</u>GG</b> RWGRPVGRRRRPVRVYP[OH]*  | hnRNP H; (P31943)                       |
| [H] <b><u>MLALIS</u>R</b> RWGRPVGRRRRPVRVYP [OH]* | hARL8b; (Q9NVJ2)                        |
| [H] <b><u>MLGTG</u>PA</b> RWGRPVGRRRRPVRVYP [OH]* | mTOR; (P42345)                          |
| [H] <b><u>MKEE</u>VKG</b> RWGRPVGRRRRPVRVYP[OH]*  | Kinesin KIF4A (Q95239)                  |
| [H] <b><u>MDEL</u>FPL</b> RWGRPVGRRRRPVRVYP [OH]* | NF- $\kappa$ B/p65 (Q04206)             |
| [H] <b><u>DDIA</u>AL</b> RWGRPVGRRRRPVRVYP[OH]*   | $\beta$ -actin (NP_001092)              |

The custom made peptides were obtained from BioGenes or Sigma Genosys.

\* Bold indicates amino acids found in corresponding protein while underlines indicate the residues used to identify the peptides in the text.

**Table II** Primer sequences used to mutate GST-hNaa50p

| hNaa50p mutants | Sequence<br>5' – 3'                     |
|-----------------|-----------------------------------------|
| R84A            | GTCTGGCACCTTACGCAAGGCTAGGAATAGG         |
| Y124F           | GTCGGCAATTGACTTCTTCAGGAAGTTTGGCTTTGAG   |
| K34R            | CCAGTCAGCTACAATGACAGGTTCTACAAGGATGTGCTG |
| K37R            | GACAAGTTCTACAGGGATGTGCTGGAGGTTGGC       |
| K140R           | CAAAGAAGA ACTACTATAGGAGGATAGAGCCCGC     |

**Table III Potential human *in vivo* substrates for hNaa50p mediated acetylation**

| <b>Protein name</b>                                                  | <b>Protein ID code</b> | <b>N-terminal protein sequence</b> |
|----------------------------------------------------------------------|------------------------|------------------------------------|
| EF-hand calcium-binding domain-containing protein 2                  | Q5VUJ9                 | <u>MLGP</u> GQVRLRPR               |
| Protein kinase-like protein SgK071                                   | Q8NE28                 | <u>MLGP</u> GSNRRRPT               |
| Putative uncharacterized protein C1orf180                            | Q8NAE3                 | <u>MLGP</u> NAQVTVVV               |
| Dihydrodipicolinate synthase-like, mitochondrial precursor           | Q86XE5                 | <u>MLGP</u> QVWSSVRQ               |
| Synaptopodin                                                         | Q8N3V7                 | <u>MLGP</u> HLPPLA                 |
| Taste receptor type 1 member 3 precursor (Sweet taste receptor T1R3) | Q7RTX0                 | <u>MLGP</u> AVLGLSLW               |
| Alkaline phosphatase, placental type precursor (PLAP-1)              | P05187                 | <u>MLGP</u> CMLLLLLL               |
| Olfactory receptor 52I2                                              | Q8NH67                 | <u>MLGP</u> AYNHTMET               |
| Olfactory receptor 52I1 (Olfactory receptor OR11-13)                 | Q8NGK6                 | <u>MLGP</u> AYNHTMET               |
| <b>Heterogeneous nuclear ribonucleoprotein F (hnRNP F)</b>           | <b>P52597</b>          | <b><u>MLGP</u> EGGEFV</b>          |
| Calcium-dependent secretion activator 1 (CAPS-1)                     | Q9ULU8                 | <u>MLDP</u> SSSEESD                |
| Calcium-dependent secretion activator 2 (CAPS-2)                     | Q86UW7                 | <u>MLDP</u> SSSEESD                |
| TIMELESS-interacting protein                                         | Q9BVW5                 | <u>MLEP</u> QENGVIDL               |
| Putative forkhead box protein ENSP00000381211                        | A8MTJ6                 | <u>MLSP</u> ERRDQPRS               |
| Transmembrane protein C9orf144B                                      | Q6ZU69                 | <u>MLSP</u> TFVLWEVG               |
| RUN and SH3 domain-containing protein 1 (Nesca)                      | Q9BVN2                 | <u>MLSP</u> QRALLCNL               |
| Armadillo repeat-containing protein 2                                | Q8NEN0                 | <u>MLSP</u> NDKMLGKL               |
| Rho GTPase-activating protein 22                                     | Q7Z5H3                 | <u>MLSP</u> KIRQARRA               |
| Zinc finger protein 671                                              | Q8TAW3                 | <u>MLSP</u> VSRDASDA               |
| Atlastin-3                                                           | Q6DD88                 | <u>MLSP</u> QRVAAAAS               |
| p53 and DNA damage-regulated protein 1                               | Q9NUG6                 | <u>MLSP</u> EAERVRLRY              |
| Olfactory receptor 5M10 (Olfactory receptor OR11-207)                | Q6IEU7                 | <u>MLSP</u> NHTIVTEF               |
| Sulfotransferase family cytosolic 1B member 1                        | O43704                 | <u>MLSP</u> KDILRKDL               |
| Uncharacterized protein C11orf49                                     | Q9H6J7                 | <u>MLSP</u> ERLALPDY               |
| Uncharacterized protein MGC35361                                     | Q8N0U4                 | <u>MLAP</u> CSGWELGC               |
| Thrombospondin-4 precursor                                           | P35443                 | <u>MLAP</u> RGAAVLLL               |
| Leucine-rich repeat and transmembrane domain protein 2 precursor     | Q8N967                 | <u>MLAP</u> GSSPGQRG               |
| Kanadapin (Lung cancer oncogene 3 protein - HLC-3)                   | Q9BWU0                 | <u>MLAP</u> LRNAPGRE               |
| Uncharacterized protein FLJ37543 precursor                           | Q2M2E5                 | <u>MLAP</u> LFLCCLRN               |
| Putative transcript Y 12 protein                                     | Q9BZ98                 | <u>MIDP</u> ETRHKAFL               |
| Retrotransposon-like protein 1                                       | A6NKG5                 | <u>MIEP</u> SEDSFETM               |
| Chloride anion exchanger (Solute carrier family 26 member 3)         | P40879                 | <u>MIEP</u> FGNQYIVA               |
| C-type lectin domain family 2 member A                               | Q6UVW9                 | <u>MINP</u> ELRDGRAD               |
| Zinc finger protein 221                                              | Q9UK13                 | <u>MISP</u> SLELLHSG               |
| TRAF3-interacting modulator (TRAF3-interacting protein 3)            | Q9Y228                 | <u>MISP</u> DPRPSPGL               |
| Alkaline phosphatase, tissue-nonspecific isozyme precursor           | P05186                 | <u>MISP</u> FLVLAIGT               |
| Beta-2-glycoprotein 1 precursor (Beta-2-glycoprotein I)              | P02749                 | <u>MISP</u> VLILFSSF               |
| Putative BMP-2-inducible kinase-like protein                         | Q5H9B9                 | <u>MIAP</u> SPKSSEEE               |
| Zinc finger BED domain-containing protein 5                          | Q49AG3                 | <u>MIAP</u> LLCILSYN               |

## Supplemental Figures

### **Figure S1. MALDI-MS spectra of immunoprecipitated Xpress-hNaa50p from transfected HeLa cells.**

Xpress-hNaa50p was isolated from transfected HeLa cells by immunoprecipitation with anti-Xpress antibody. **A.** MALDI-MS spectra (mass range 2.100- 2.200) showing a peptide with  $m/z$  of 2173.2 corresponding to acetylated lysine 34. **B.** MALDI-MS spectra (mass range 1.190- 2.050) showing a peptide with  $m/z$  of 1987.1 corresponding to acetylated lysine 140.

### **Figure S2. MALDI-MS and MS/MS spectra of autoacetylated GST-hNaa50p.**

**A.** MALDI-MS spectrum of Lys-C produced peptides of recombinant GST-hNaa50p. Monoisotopic peaks are labelled with their respective  $m/z$  ratio. The +42 Da MALDI-molecular ions of  $m/z$  1552.769, 1986.980 and 2173.072, are indicated with **B**, **C** and **D**, respectively, which also refer to the MS/MS spectra shown in the figure. The identities of the acetylated lysines present in the peptides are indicated. **B**, **C** and **D**. Tandem mass spectra of the  $m/z$  1552.769, 1986.980 and 2173.072 ions, respectively, indicate the observed fragmentation pattern and the sequence ion assignments. Predicted ions (b and y) are shown at top of the figures. The acetylated lysines are displayed as 'acK' in the amino acid sequences.

### **Figure S3. Knockdown of human NatA with siRNA targeting hNAA15p also reduces protein levels of hNaa50p.**

WB analyses using anti-hNaa50p, anti-hNaa15p and anti-tubulin antibodies. si-non-targeting represent cell lysate from HeLa cells transfected with a non-targeting siRNA, lane 2: Cell lysate from HeLa cells transfected with si-*NAA15*, lane 3: Cell lysate from HeLa cells transfected with si-*hNAA50*.

Figure S1

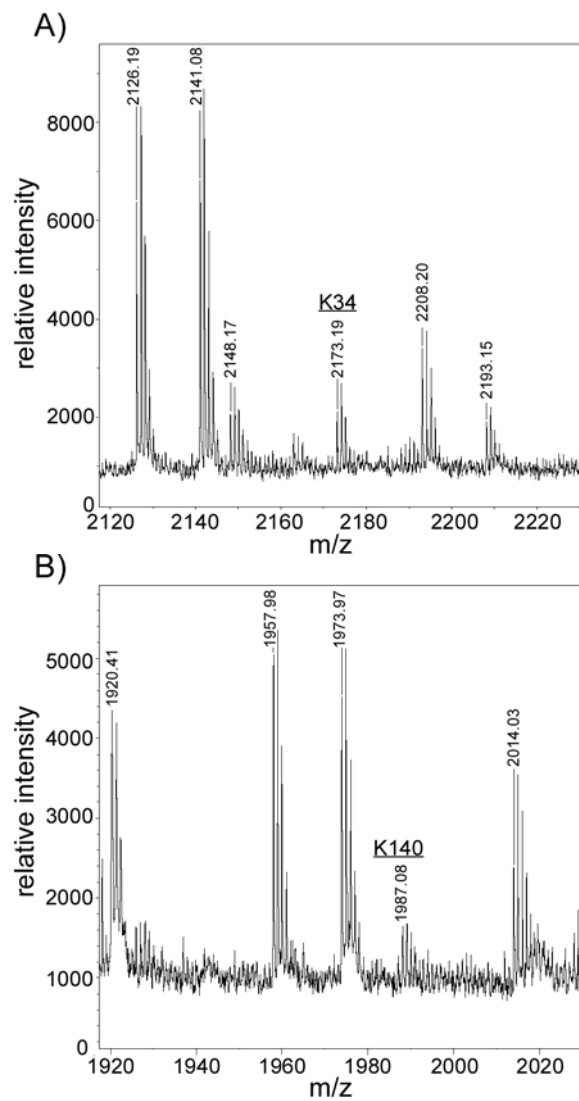

Figure S2

A)

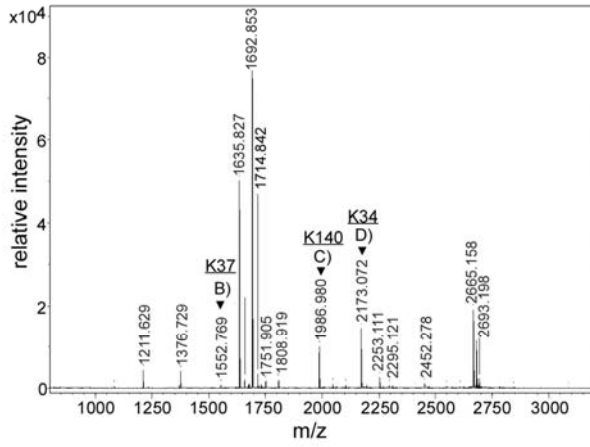

B)

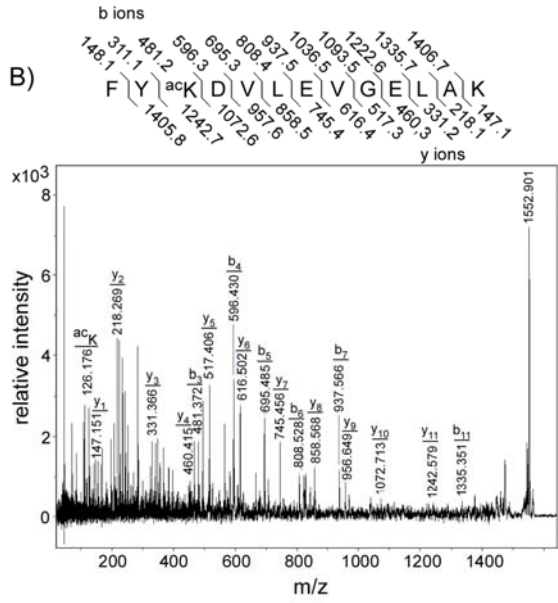

C)

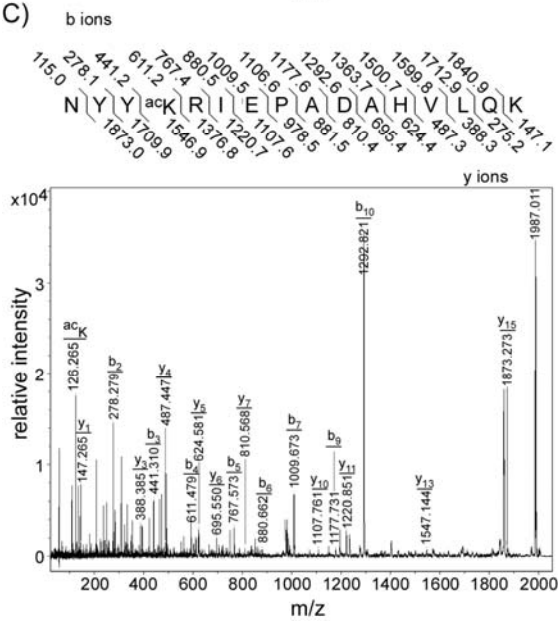

D)

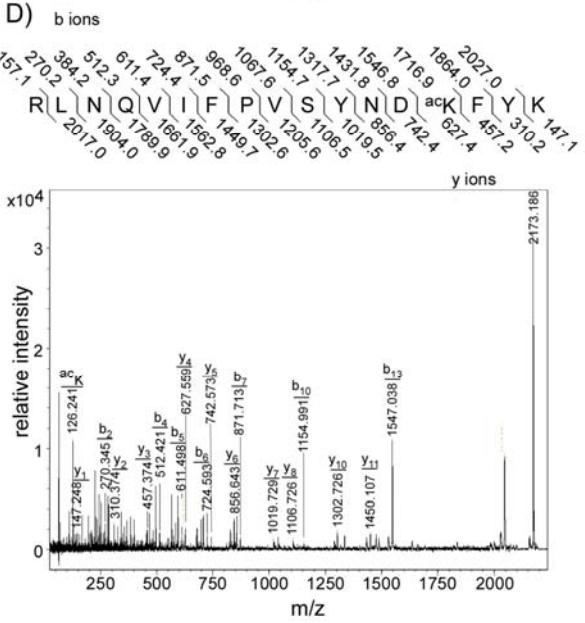

Figure S3

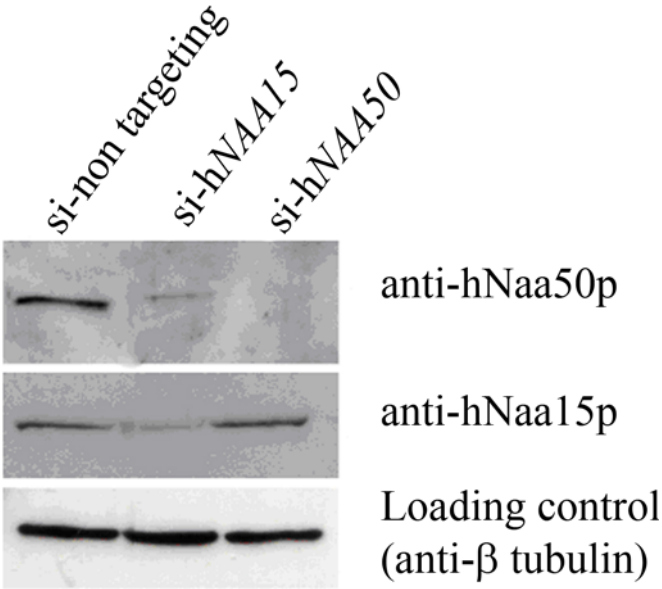

Supplement: supp_M109.001347_jbc.M109.001347-1.pdf [file supp_M109.001347_jbc.M109.001347-1.pdf]
